# Supplementary material
Source: PubMed Central journal article supplement (PMC5857259)
Supplement: 13280_2017_943_MOESM1_ESM.pdf [file 13280_2017_943_MOESM1_ESM.pdf]

***Ambio***

Electronic Supplementary Material

*This supplementary material has not been peer reviewed.*

Title: **Experiences from harvest-driven conservation: Management of Amazonian river turtles as a common-pool resource**

Authors: Elina Harju, Anders H. Sirén, Matti Salo

## **Interviews scheme**

### **Part 1. Question framework for management group members**

Name:

Community:

Management group:

Age:

#### **Importance of the resource:**

- What are taricayas used for? / What is their importance? For whom?
- If they disappeared what would you do?
- What kind of expectations do you have in relation to the management?
- Have you achieved what you expected?
- What are the most important or the best management activities? Why?
- People keep eating taricayas and/or their eggs?
- What would happen if you could no longer eat them?
- How did taricaya management begin? Why?

#### **Local participation:**

- How do you participate in the management of taricayas?
- Why do you want to participate?
- Is it important for you to participate? Why?
- Do you think local people should participate, more or less, in this activity? Why?
- Who can take part in the management groups? How are the members selected?
- Who else participates? What is their importance?
- Why are there people that do not participate?

#### **Impacts of management:**

- What was the situation of the taricayas when the management began?
- Has there been a change in the quantity of taricayas? What kind of change? In the whole reserve? In the buffer zone? Outside the reserve? Depending on the area/management sector?
- How do you know about this change?
- What is the situation of the taricayas today?
- Has the quantity of taricayas at some moment been higher than today?
- Why has the quantity changes? What influences the number of taricayas? Why do you think so?
- Are there some other possible reasons influencing the quantity of taricayas?
- You have released many hatchlings in the reserve. Do you think that many of them will survive? Why do you think so? Do you have an idea about how many of them survive in case you do not protect the eggs?
- What do the released hatchlings serve for?
- What kind of other impacts does the management have? What effects does it have in the taricayas?
- Whom does the management affect? How has it influenced your family and community?
- Do people benefit from the management? How?
- Who get the most benefits? Why them?
- Do you think there will be benefits in the future? More or less compared with today?

- If taricayas were not managed who would suffer most?
- Are there negative impacts, costs or other adverse effects? Which are they?
- Who suffers the most? Why?
- What would happen if...
  - ...taricaya management would cease
  - ...you could no longer manage the taricayas? Sell hatchlings? Use eggs?

**Restrictions, rules and trust:**

- Is the use of taricayas controlled? Can you tell me about the restrictions?
- What do you think about these restrictions?
- Does someone supervise the compliance of the locals with the rules?
- Do you trust the other participants (in your group, other groups, reserve staff)? Why?
- How have the restrictions and rules been crafted? By whom? Who have made the decisions about the use of taricayas?
- What can you do to influence/modify the restrictions?
- What do people think about the management of taricayas?
- Are there illegal harvesters? What do they do? How do they affect the taricayas and the management?
- How many illegals are there? Has their number changed? Why?
- Are there conflicts? Are there people who do not like the management?
- Are there people who do not like the work of your management group? Who? What have they done?

**Taricaya migration habits:**

- Where do the taricayas live? Do they migrate?
- Where do the released hatchlings go?
- How far do they migrate? Do they go outside the reserve? Do they all leave?

**The future:**

- What will be the future of taricaya management?
- Is it necessary to continue the management? Why? Which activities?
- For whom is it necessary? Why them?
- What are your hopes for the future of the management? Do you think the taricayas will become more abundant?

## **Part 2. Question framework for professionals**

Name:

Organization:

Position:

### **Importance of the resource:**

- What are taricayas used for? / What is their importance? For whom?
- Is it important to your organization engage in the management of taricayas? Why?
- What kind of hopes and expectations has your organization have in relation to the management?
- Have you achieved them?
- What are the most important or the best management activities? Why?
- People keep eating taricayas and/or their eggs? What would happen if they could no longer eat them?
- How did taricaya management begin? Why?

### **Participation:**

- Why does your organization participate in the management scheme?
- Is it important that your organization participates? Why?
- Why do the local people (management group members) participate in the scheme?
- Is it important that they participate? Why? What would happen if they did not participate anymore.
- Do you think local people should participate more or less in this activity? Why?
- Who can take part in the management groups? How are the members selected?
- Why are there people that do not participate?
- Who else participates? What is their importance?

### **Impacts of management:**

- What was the situation of the taricayas when the management began?
- Has there been a change in the quantity of taricayas? What kind of change? In the whole reserve? In the buffer zone? Outside the reserve? Depending on the area/management sector?
- How do you know about this change?
- What is the situation of the taricayas today?
- Has the quantity of taricayas at some moment been higher than today?
- Why has the quantity changes? What influences the number of taricayas? Why do you think so?
- Are there some other possible reasons influencing the quantity of taricayas?
- Several hatchlings have been released in the reserve. Do you think that many of them will survive? Why do you think so? Do you have an idea about how many of them survive naturally, without any management actions? Without no one touching the eggs?
- What do the released hatchlings serve for?
- What kind of other impacts does the management have? What effects does it have in the taricayas?
- Whom does the management affect? How?
- Do people benefit from the management? How?
- Who get the most benefits? Why them?
- Do you think there will be benefits in the future? More or less compared with today?
- If taricayas were not managed who would suffer most?

- Are there negative impacts, costs or other adverse effects? Which are they?
- Who suffers the most? Why?
- What would happen if...
  - ...taricaya management would cease
  - ...people could no longer manage the taricayas? Sell hatchlings? Use eggs?

**Restrictions, rules and trust:**

- Is the use of taricayas controlled? Can you tell me about the restrictions?
- Does someone supervise the compliance of the locals with the rules?
- Do you trust the management groups? Why?
- How have the restrictions and rules been crafted? By whom? Who have made the decisions about the use of taricayas?
- What can one do to influence/modify the restrictions?
- Why do the limitations vary between groups?
- What do people think about the management of taricayas?
- Are there illegal harvesters? What do they do? How do they affect the taricayas and the management?
- How many illegals are there? Has their number changed? Why?
- Are there conflicts? Are there people who do not like the management? Who? What have they done?

**Taricaya migration habits:**

- Do taricayas migrate?
- How far do they migrate? Do they go outside the reserve? Do they all leave?

**The future:**

- What will be the future of taricaya management?
- Is it necessary to continue the management? Why? Which activities?
- How can one secure that the management will not cease?
- For whom is it necessary? Why them?
- What are your hopes for the future of the management? Do you think the taricayas will become more abundant?
- Are there plans to increase the number of groups in the scheme?
